# Supplementary material for: Molecular and antigen tests, and sample types for diagnosis of COVID-19: a review
Source: Future Virol. 2022 Jul 1;17(9):675–85. doi: 10.2217/fvl-2021-0256 (PMC9248776; doi:10.2217/fvl-2021-0256)
Supplement: Supplementary file 1 [file fvl-17-675-s1.xlsx]

## Sheet: RT-PCR
Date	Manufactory	Letter Granting Inclusion under EUA and Original Issue Date	Diagnostic Testing	Assay Techniques	Sensitivity	Specificity
2020-03-15	Wadsworth Center, New York State Department of Public Health's (CDC)	New York SARS-CoV-2 Real-time Reverse Transcriptase (RT)-PCR Diagnostic Panel	Molecular Test	RT-PCR	Not Reported	Not Reported
		2020-02-29
2020-04-01	Ipsum Diagnostics, LLC	COV-19 IDx assay	Molecular Test	RT-PCR	1	1
		2020-04-01
2020-04-03	Massachusetts General Hospital	MGH COVID-19 qPCR assay	Molecular Test	RT-PCR	1	1
		2020-04-03
2020-04-03	Co-Diagnostics, Inc.	Logix Smart Coronavirus Disease 2019 (COVID-19) Kit	Molecular Test	RT-PCR	1	1
		2020-04-03
2020-04-10	Specialty Diagnostic (SDI) Laboratories	SDI SARS-CoV-2 Assay	Molecular Test	RT-PCR	1	1
		2020-04-10
2020-04-13	Integrity Laboratories	SARS-CoV-2 Assay	Molecular Test	RT-PCR	1	1
		2020-04-13
2020-04-16	GenoSensor, LLC	GS"¢ COVID-19 RT-PCR KIT	Molecular Test	RT-PCR	Not Reported	Not Reported
		2020-04-16
2020-04-23	Southwest Regional PCR Laboratory LLC. dba MicroGen DX	COVID-19 Key	Molecular Test	RT-PCR	1	1
		2020-04-23
2020-04-23	SD Biosensor, Inc.	STANDARD M nCoV Real-Time Detection Kit	Molecular Test	RT-PCR	Not Reported	Not Reported
		2020-04-23
2020-04-24	Ultimate Dx Laboratory	UDX SARS-CoV-2 Molecular Assay	Molecular Test	RT-PCR	1	1
		2020-04-24
2020-04-28	Biocerna	SARS-CoV-2 Assay	Molecular Test	RT-PCR	100% for all targets (on Copan swab) On Genotek swab: 100% for N gene, 95% for ORF1ab, 85% for S gene	100% for all targets
		2020-04-28
2020-05-04	Sansure BioTech Inc.	Novel Coronavirus (2019-nCoV) Nucleic Acid Diagnostic Kit (PCR-Fluorescence Probing)	Molecular Test	RT-PCR	1	1
		2020-05-04
2020-05-11	1drop Inc.	1copy COVID-19 qPCR Multi Kit	Molecular Test	RT-PCR	1	0.98
		2020-05-11
2020-05-13	One Health Laboratories, LLC	SARS-CoV-2 Real-Time RT-PCR-Test	Molecular Test	RT-PCR	1	0.98
		2020-05-13
2020-05-13	Cedars-Sinai Medical Center, Department of Pathology and Laboratory Medicine	Cedars-Sinai SARS-CoV-2 Assay	Molecular Test	RT-PCR	1	1
		2020-05-13
2020-05-22	Avera Institute for Human Genetics	Avera Institute for Human Genetics SARS-CoV-2 Assay	Molecular Test	RT-PCR	1	1
		2020-05-22
2020-06-01	Aspirus Reference Laboratory	Aspirus SARS-CoV rRT Assay	Molecular Test	RT-PCR	1	1
		2020-06-01
2020-06-04	Yale New Haven Hospital, Clinical Virology Laboratory	SARS-CoV-2 PCR test	Molecular Test	RT-PCR	1	1
		2020-03-31
2020-06-04	Nebraska Medicine Clinical Laboratory	NEcov19 RT-PCR Assay	Molecular Test	RT-PCR	1	1
		2020-06-04
2020-06-04	Altru Diagnostics, Inc.	Altru Dx SARS-CoV-2 RT-PCR assay	Molecular Test	RT-PCR	1	1
		2020-04-30
2020-06-04	DiaSorin Molecular LLC	Simplexa COVID-19 Direct assay	Molecular Test	RT-PCR	Not Reported	Not Reported
		2020-03-19
2020-06-05	Genetron Health (Beijing) Co., Ltd.	Genetron SARS-CoV-2 RNA Test	Molecular Test	RT-PCR	1	0.971
		2020-06-05
2020-06-10	Warrior Diagnostics, Inc.	Warrior Diagnostics SARS-CoV-2 Assay	Molecular Test	RT-PCR	1	1
		2020-06-10
2020-06-10	Tide Laboratories, LLC	DTPM COVID-19 RT-PCR Test	Molecular Test	RT-PCR	1	1
		2020-06-10
2020-06-11	KorvaLabs Inc.	Curative-Korva SARS-Cov-2 Assay	Molecular Test	RT-PCR	1	1
		2020-04-16
2020-06-12	RTA Laboratories Biological Products Pharmaceutical and Machinery Industry	Diagnovital SARS-CoV-2 Real-Time PCR Kit	Molecular Test	RT-PCR	1	1
		2020-06-12
2020-06-17	The Ohio State University Wexner Medical Center	OSUWMC COVID-19 RT-PCR test	Molecular Test	RT-PCR	1	1
		2020-06-17
2020-06-23	University of Alabama at Birmingham Fungal Reference Lab	FRL SARS CoV-2 Test	Molecular Test	RT-PCR	Not Reported	Not Reported
		2020-06-23
2020-06-24	University of Texas MD Anderson Cancer Center, Molecular Diagnostics Laboratory	MD Anderson High-throughput SARS-CoV-2 RT-PCR Assay	Molecular Test	RT-PCR	1	1
		2020-06-24
2020-06-25	PreciGenome LLC	FastPlex Triplex SARS-CoV-2 detection kit (RT-Digital PCR)	Molecular Test	RT-PCR	0.963	0.967
		2020-06-25
2020-06-26	Inform Diagnostics, Inc.	Inform Diagnostics SARS-CoV-2 RT-PCR Assay	Molecular Test	RT-PCR	0.939	1
		2020-06-26
2020-06-29	LifeHope Labs	LifeHope 2019-nCoV Real-Time RT-PCR Diagnostic Panel	Molecular Test	RT-PCR	Not Reported	Not Reported
		2020-06-29
2020-06-30	TNS Co., Ltd (Bio TNS)	COVID-19 RT-PCR Peptide Nucleic Acid (PNA) kit	Molecular Test	RT-PCR	Not Reported	Not Reported
		2020-06-30
2020-07-10	Boston Medical Center	BMC-CReM COVID-19 Test	Molecular Test	RT-PCR	1	1
		2020-07-10
2020-07-13	Compass Laboratory Services, LLC	Compass Laboratory Services SARS-CoV2 Assay	Molecular Test	RT-PCR	1	0.96
		2020-07-13
2020-07-24	Jiangsu CoWin Biotech Co., Ltd.	Novel Coronavirus (SARS-CoV-2) Fast Nucleic Acid Detection Kit (PCR-Fluorescence Probing)	Molecular Test	RT-PCR	1	1
		2020-07-24
2020-07-29	Mayo Clinic Laboratories, Rochester, MN	SARS-CoV-2 Molecular Detection Assay	Molecular Test	PCR	1	1
		2020-04-20
2020-07-30	Abbott Molecular	Abbott RealTime SARS-CoV-2 assay	Molecular Test	RT-PCR	1	0.97
		2020-03-18
2020-07-30	Clinical Reference Laboratory, Inc.	CRL Rapid Response	Molecular Test	RT-PCR	1	1
		2020-07-30
2020-07-31	University of California San Diego Health	UCSD RC SARS-CoV-2 Assay	Molecular Test	RT-PCR	0.977	0.983
		2020-07-31
2020-08-05	Vela Operations Singapore Pte Ltd	ViroKey SARS-CoV-2 RT-PCR Test	Molecular Test	RT-PCR	Not Reported	Not Reported
		2020-08-05
2020-08-07	George Washington University Public Health Laboratory	GWU SARS-CoV-2 RT-PCR Test	Molecular Test	RT-PCR	0.95	1
		2020-08-07
2020-08-08	Trax Management Services Inc.	PhoenixDx 2019-CoV	Molecular Test	RT-PCR	Not Reported	Not Reported
		2020-04-20
2020-08-11	dba SpectronRX	Hymon SARS-CoV-2 Test Kit	Molecular Test	RT-PCR	1	1
		2020-05-22
2020-08-17	ZhuHai Sinochips Bioscience Co., Ltd.	COVID-19 Nucleic Acid RT-PCR Test Kit	Molecular Test	RT-PCR	Not Reported	Not Reported
		2020-08-17
2020-08-18	GenMark Diagnostics, Inc.	ePlex SARS-CoV-2 Test	Molecular Test	RT-PCR	1	1
		2020-03-19
2020-08-21	Quest Diagnostics Infectious Disease, Inc.	Quest Diagnostics HA SARS-CoV-2 Assay	Molecular Test	RT-PCR	Not Reported	Not Reported
		2020-07-15
2020-08-31	MiraDx	MiraDx SARS-CoV-2 RT-PCR assay	Molecular Test	RT-PCR	0.969	1
		2020-08-31
2020-09-04	Everlywell, Inc.	Everlywell COVID-19 Test Home Collection Kit	Molecular Test	RT-PCR	Not Reported	Not Reported
		2020-05-15
2020-09-14	Columbia University Laboratory of Personalized Genomic Medicine	TRIPLEX CII-SARS-CoV-2 rRT-PCR TEST	Molecular Test	RT-PCR	1	1
		2020-05-12
2020-09-18	GK Pharmaceuticals Contract Manufacturing Operations	GK ACCU-RIGHT SARS-CoV-2 RT-PCR KIT	Molecular Test	RT-PCR	1	1
		2020-09-18
2020-09-21	QIAGEN GmbH	QIAstat-Dx Respiratory SARS-CoV-2 Panel	Molecular Test	RT-PCR	Not Reported	Not Reported
		2020-03-30
2020-09-21	Gravity Diagnostics, LLC	Gravity Diagnostics COVID-19 Assay	Molecular Test	RT-PCR	96.4% (symptomatic), 100% (asymptomatic)	100% (symptomatic), 100% (asymptomatic)
		2020-06-01
2020-09-21	ChromaCode Inc.	HDPCR SARS-CoV-2 Assay	Molecular Test	RT-PCR	Not Reported	Not Reported
		2020-06-09
2020-09-21	HealthQuest Esoterics	HealthQuest Esoterics TaqPath SARS-CoV-2 Assay	Molecular Test	RT-PCR	1	1
		2020-06-23
2020-09-21	Psomagen, Inc.	Psoma COVID-19 RT Test	Molecular Test	RT-PCR	1	1
		2020-06-30
2020-09-21	KogeneBiotech Co., Ltd.	PowerChek 2019-nCoV Real-time PCR Kit	Molecular Test	RT-PCR	Not Reported	Not Reported
		2020-07-13
2020-09-21	Boston Heart Diagnostics	Boston Heart COVID-19 RT-PCR Test	Molecular Test	RT-PCR	0.97	0.97
		2020-07-16
2020-09-21	Eli Lilly and Company	Lilly SARS-CoV-2 Assay	Molecular Test	RT-PCR	1	0.93
		2020-07-27
2020-09-21	University of North Carolina Medical Center	UNC Health SARS-CoV-2 real-time RT-PCR test	Molecular Test	RT-PCR	1	1
		2020-04-10
2020-09-21	Pathology/Laboratory Medicine Lab of Baptist Hospital Miami	COVID-19 RT-PCR Test	Molecular Test	RT-PCR	0.9333	0.9667
		2020-04-13
2020-09-21	Infectious Diseases Diagnostics Laboratory (IDDL), Boston Children's Hospital	Childrens-Altona-SARS-CoV-2 Assay	Molecular Test	RT-PCR	1	1
		2020-04-14
2020-09-21	CirrusDx Laboratories	CirrusDx SARS-CoV-2 Assay	Molecular Test	RT-PCR	0.95	1
		2020-04-15
2020-09-21	Ethos Laboratories	Ethos Laboratories SARS-CoV-2 MALDI-TOF Assay	Molecular Test	RT-PCR	0.981	0.963
		2020-08-03
2020-09-21	Exact Sciences Laboratories	SARS-CoV-2 (N gene detection) Test	Molecular Test	RT-PCR	0.95	1
		2020-05-22
2020-09-21	Patients Choice Laboratories, LLC	PCL SARS-CoV-2 Real-Time RT-PCR Assay	Molecular Test	RT-PCR	1	1
		2020-08-28
2020-09-22	Becton, Dickinson & Company (BD)	BioGX SARS-CoV-2 Reagents for BD MAX System	Molecular Test	RT-PCR	Not Reported	Not Reported
		2020-04-02
2020-09-22	Diatherix Eurofins Laboratory	SARS-CoV-2 PCR Test	Molecular Test	PCR	0.989	1
		2020-04-22
2020-09-22	LabGenomics Co., Ltd.	LabGun COVID-19 RT-PCR Kit	Molecular Test	RT-PCR	Not Reported	Not Reported
		2020-04-29
2020-09-22	Quadrant Biosciences Inc.	Clarifi COVID-19 Test Kit	Molecular Test	RT-PCR	Not Reported	Not Reported
		2020-09-22
2020-09-22	Vela Operations Singapore Pte. Ltd.	ViroKey SARS-CoV-2 RT-PCR Test v2.0	Molecular Test	RT-PCR	Not Reported	Not Reported
		2020-09-22
2020-09-23	Becton, Dickinson & Company	BD SARS-CoV-2Reagents for BD MAX System	Molecular Test	RT-PCR	Not Reported	Not Reported
		2020-04-08
2020-09-24	Acupath Laboratories, Inc.	Acupath COVID-19 Real-Time (RT-PCR) Assay	Molecular Test	RT-PCR	1	1
		2020-06-29
2020-09-25	Avellino Lab USA, Inc.	AvellinoCoV2 test	Molecular Test	RT-PCR	1	1
		2020-03-25
2020-09-29	Akron Children’s Hospital	Akron Children’s Hospital SARS-CoV-2 Assay	Molecular Test	RT-PCR	0.97	0.98
		2020-09-29
2020-09-29	National Jewish Health	SARS-CoV-2 MassArray Test	Molecular Test	RT-PCR	1	1
		2020-09-29
2020-09-30	Aeon Global Health	Aeon Global Health SARS-CoV-2 Assay	Molecular Test	RT-PCR	1	0.97
		2020-09-30
2020-09-30	Alimetrix, Inc.	Alimetrix SARS-CoV-2 RT-PCR Assay	Molecular Test	RT-PCR	100% (automated extraction), 96.7% (manual)	93.3% (automated extraction), 93% (manual)
		2020-09-30
2020-10-01	Tempus Labs, Inc.	iC SARS-CoV2 Test	Molecular Test	RT-PCR	1	0.97
		2020-10-01
2020-10-02	Cuur Diagnostics	Cuur Diagnostics SARS-CoV-2 Molecular Assay	Molecular Test	RT-PCR	0.96	1
		2020-08-26
2020-10-17	Genetrack Biolabs, Inc.	Genetrack SARS-CoV-2 Molecular Assay	Molecular Test	RT-PCR	Not Reported	Not Reported
		2020-09-25
2020-10-20	P23 Labs, LLC.	P23 Labs TaqPath SARS-CoV-2 Assay	Molecular Test	RT-PCR	Not Reported	Not Reported
		2020-05-21
2020-10-28	Luminex Molecular Diagnostics, Inc.	NxTAG CoV Extended Panel Assay	Molecular Test	RT-PCR	Not Reported	Not Reported
		2020-03-27
2020-10-28	Luminex Corporation	ARIES SARS-CoV-2 Assay	Molecular Test	RT-PCR	Not Reported	Not Reported
		2020-04-03
2020-10-28	DNA Genotek Inc.	ORAcollect∙RNA OR-100 and ORAcollect∙RNA ORE-100 saliva collection devices	Molecular Test	RT-PCR	Not Reported	Not Reported
		2020-10-28
2020-10-31	Beijing Wantai Biological Pharmacy Enterprise Co., Ltd.	Wantai SARS-CoV-2 RT-PCR Kit	Molecular Test	RT-PCR	1	1
		2020-09-09
2020-11-02	Seegene, Inc.	Allplex 2019-nCoV Assay	Molecular Test	RT-PCR	Not Reported	Not Reported
		2020-04-21
2020-11-04	Euroimmun US, Inc.	EURORealTime SARS-Cov-2	Molecular Test	RT-PCR	Not Reported	Not Reported
		2020-06-08
2020-11-06	BioMérieux SA	SARS-COV-2 R-GENE	Molecular Test	RT-PCR	1	1
		2020-05-06
2020-11-10	Xiamen Zeesan Biotech Co., Ltd.	SARS-CoV-2 Test Kit (Real-time PCR)	Molecular Test	RT-PCR	1	1
		2020-07-31
2020-11-13	Quest Diagnostics Infectious Disease, Inc.	Quest SARS-CoV-2 rRT-PCR	Molecular Test	RT-PCR	Not Reported	Not Reported
		2020-03-17
2020-11-20	Trax Management Services Inc.	PhoenixDx SARS-CoV-2 Multiplex	Molecular Test	RT-PCR	Not Reported	Not Reported
		2020-07-13
2020-11-21	Applied DNA Sciences, Inc.	Linea COVID-19 Assay Kit	Molecular Test	RT-PCR	Not Reported	Not Reported
		2020-05-13
2020-11-24	Stanford Health Care Clinical Virology Laboratory	SARS-CoV-2 RT-PCR Assay	Molecular Test	RT-PCR	1	1
		2020-04-08
2020-11-30	Infinity BiologiX LLC	Infinity BiologiX TaqPath SARS-CoV-2 Assay	Molecular Test	RT-PCR	Not Reported	Not Reported
		2020-04-10
2020-12-01	Centers for Disease Control and Prevention's (CDC)	CDC 2019-nCoV Real-Time RT-PCR Diagnostic Panel (CDC)	Molecular Test	RT-PCR	Not Reported	Not Reported
		2020-02-04
2020-12-07	Applied BioCode, Inc.	BioCode SARS-CoV-2 Assay	Molecular Test	RT-PCR	0.976	0.961
		2020-06-15
2020-12-09	Laboratory Corporation of America (LabCorp)	COVID-19 RT-PCR Test	Molecular Test	RT-PCR	1	1
		2020-03-16
2020-12-09	Bio-Rad Laboratories, Inc	Bio-Rad SARS-CoV-2 ddPCR Test	Molecular Test	RT-PCR	1	1
		2020-05-01
2020-12-09	DxTerity Diagnostics, Inc.	DxTerity SARS-CoV-2 RT-PCR Test	Molecular Test	RT-PCR	Not Reported	Not Reported
		2020-08-21
2020-12-09	Laboratory Corporation of America (LabCorp)	Pixel by LabCorp COVID-19 Test Home Collection Kit	Molecular Test	RT-PCR	1	1
		2020-12-09
2020-12-10	Roche Molecular Systems, Inc.	cobas SARS-CoV-2	Molecular Test	RT-PCR	1	1
		2020-09-14
2020-12-17	Materials and Machines Corporation of America (DBA MatmaCorp, Inc.)	MatMaCorp COVID-19 2SF Test	Molecular Test	RT-PCR	0.885	1
		2020-12-17
2020-12-18	BioCore Co., Ltd.	BioCore 2019-nCoV Real Time PCR Kit	Molecular Test	RT-PCR	1	1
		2020-05-21
2020-12-18	Clinical Research Sequencing Platform (CRSP), LLC at the Broad Institute of MIT and Harvard	CRSP SARS-CoV-2 Real-time Reverse Transcriptase (RT)-PCR Diagnostic Assay	Molecular Test	RT-PCR	0.983	1
		2020-07-08
2020-12-22	BioFire Diagnostics, LLC	BioFire Respiratory Panel 2.1 (RP2.1)	Molecular Test	RT-PCR	1	1
		2020-05-01
2020-12-22	Verily Life Sciences	Verily COVID-19 RT-PCR Test	Molecular Test	RT-PCR	1	1
		2020-09-08
2020-12-23	Abbott Molecular Inc.	Alinity m SARS-CoV-2 assay	Molecular Test	RT-PCR	Not Reported	Not Reported
		2020-05-11
2020-12-23	Cepheid	Xpert Xpress SARS-CoV-2 DoD	Molecular Test	RT-PCR	0.95	1
		2020-12-23
2020-12-28	InBios International, Inc	Smart Detect SARS-CoV-2 rRT-PCR Kit	Molecular Test	RT-PCR	Not Reported	Not Reported
		2020-04-07
2020-12-28	Atila BioSystems, Inc.	iAMP COVID-19 Detection Kit	Molecular Test	RT-PCR	Not Reported	Not Reported
		2020-04-10
2020-12-28	Maccura Biotechnology (USA) LLC	SARS-CoV-2 Fluorescent PCR Kit	Molecular Test	RT-PCR	Not Reported	Not Reported
		2020-04-15
2020-12-28	Fosun Pharma USA Inc.	Fosun COVID-19 RT-PCR Detection Kit	Molecular Test	RT-PCR	Not Reported	Not Reported
		2020-04-17
2020-12-28	SolGent Co., Ltd	DiaPlexQ Novel Coronavirus (2019-nCoV) Detection Kit	Molecular Test	RT-PCR	1	1
		2020-05-21
2020-12-28	Omnipathology Solutions Medical Corporation	Omni COVID-19 Assay by RT-PCR	Molecular Test	RT-PCR	1	1
		2020-06-17
2020-12-28	Laboratorio Clinico Toledo	Laboratorio Clinico Toledo SARS-CoV-2 Assay	Molecular Test	RT-PCR	1	1
		2020-07-06
2020-12-28	Gene By Gene	Gene By Gene SARS-CoV-2 Detection Test	Molecular Test	RT-PCR	1	1
		2020-07-07
2020-12-28	BioSewoom, Inc.	Real-Q 2019-nCoV Detection Kit	Molecular Test	RT-PCR	1	1
		2020-07-09
2020-12-28	DiaCarta, Inc.	QuantiVirus SARS-CoV-2 Multiplex Test Kit	Molecular Test	RT-PCR	0.976	1
		2020-07-21
2020-12-28	Solaris Diagnostics	Solaris Multiplex SARS-CoV-2 Assay	Molecular Test	RT-PCR	1	1
		2020-08-10
2020-12-28	Guardant Health, Inc.	Guardant-19	Molecular Test	RT-PCR	0.955	0.983
		2020-08-21
2020-12-28	Texas Department of State Health Services, Laboratory Services Section	Texas Department of State Health Services (DSHS) SARS-CoV-2 Assay	Molecular Test	RT-PCR	1	1
		2020-08-21
2020-12-28	T2 Biosystems, Inc.	T2SARS-CoV-2 Panel	Molecular Test	RT-PCR	Not Reported	Not Reported
		2020-08-31
2020-12-28	OPTOLANE Technologies, Inc.	Kaira 2019-nCoV Detection Kit	Molecular Test	RT-PCR	1	1
		2020-09-01
2020-12-28	Nationwide Children's Hospital	SARS-CoV-2 Assay	Molecular Test	RT-PCR	1	1
		2020-04-27
2020-12-28	UTMG Pathology Laboratory	UTHSC/UCH SARS-CoV-2-RT-PCR Assay	Molecular Test	RT-PCR	1	1
		2020-05-03
2020-12-28	Biocollections Worldwide, Inc.	Biocollections Worldwide SARS-Co-V-2 Assay	Molecular Test	RT-PCR	1	1
		2020-05-07
2020-12-28	Visby Medical, Inc.	Visby Medical COVID-19	Molecular Test	RT-PCR	1	1
		2020-09-16
2020-12-28	Clear Labs, Inc.	Clear Dx SARS-CoV-2 Test	Molecular Test	RT-PCR	1	1
		2020-09-23
2020-12-28	UMass Memorial Medical Center	UMass Molecular Virology Laboratory 2019-nCoV rRT-PCR Dx Panel	Molecular Test	RT-PCR	Not Reported	Not Reported
		2020-10-01
2020-12-30	Zymo Research Corporation	Quick SARS-CoV-2rRT-PCR Kit	Molecular Test	RT-PCR	1	1
		2020-05-07
2020-12-30	Jiangsu Bioperfectus Technologies Co., Ltd.	COVID-19 Coronavirus Real Time PCR Kit	Molecular Test	RT-PCR	Not Reported	Not Reported
		2020-06-18
2021-01-05	Primerdesign Ltd.	Primerdesign Ltd COVID-19 genesig Real-Time PCR assay	Molecular Test	RT-PCR	0.947	1
		2020-03-20
2021-01-07	Cepheid	Xpert Xpress SARS-CoV-2 test	Molecular Test	RT-PCR	1	1
		2020-03-20
2021-01-08	Centers for Disease Control and Prevention (CDC)	Influenza SARS-CoV-2 (Flu SC2) Multiplex Assay	Molecular Test	RT-PCR	1	1
		2020-07-02
2021-01-14	Sherlock BioSciences, Inc.	Sherlock CRISPR SARS-CoV-2 Kit	Molecular Test	RT-PCR	Not Reported	Not Reported
		2020-05-06
2021-01-15	Bio-Rad Laboratories, Inc.	Bio-Rad Reliance SARS-CoV-2 RT-PCR Assay Kit	Molecular Test	RT-PCR	Not Reported	Not Reported
		2021-01-15
2021-01-19	Cleveland Clinic Robert J. Tomsich Pathology and Laboratory Medicine Institute	Cleveland Clinic SARS-CoV-2 Assay	Molecular Test	RT-PCR	0.97	1
		2020-08-03
2021-01-19	Hospital of the University of Pennsylvania	BD MAX COVID-19 ASSAY (Authorized by HHS/OASH)	Molecular Test	RT-PCR	Not Reported	Not Reported
		2021-01-19
2021-01-19	INNO Diagnostics Reference Laboratory, Ponce Medical School	PMSF-INNO SARS-CoV-2 RT-PCR Test (Authorized by HHS/OASH)	Molecular Test	RT-PCR	Not Reported	Not Reported
		2021-01-19
2021-01-22	NeuMoDx Molecular, Inc.	NeuMoDx SARS-CoV-2 Assay	Molecular Test	RT-PCR	1	1
		2020-03-30
2021-01-22	Express Gene LLC, DBA: Express Gene Molecular Diagnostics Laboratory	Express Gene 2019-nCoV RT-PCR Diagnostic Panel	Molecular Test	RT-PCR	1	1
		2020-05-22
2021-01-26	Fast Track Diagnostics Luxembourg S.á.r.l. (a Siemens Healthineers Company)	FTD SARS-CoV-2	Molecular Test	RT-PCR	1	1
		2020-05-05
2021-01-26	GeneMatrix, Inc.	NeoPlex COVID-19 Detection Kit	Molecular Test	RT-PCR	1	1
		2020-05-14
2021-01-27	Cepheid	Xpert Xpress SARS-CoV-2/Flu/RSV	Molecular Test	RT-PCR	97.9% (SARS-CoV-2)	100% (SARS-CoV-2)
		2020-09-24
2021-01-27	Agena Bioscience, Inc.	MassARRAY SARS-CoV-2 Panel	Molecular Test	RT-PCR	1	1
		2020-10-26
2021-01-28	Alpha Genomix Laboratories	Alpha Genomix TaqPath SARS-CoV-2 Combo Assay	Molecular Test	RT-PCR	Not Reported	Not Reported
		2020-08-10
2021-01-28	BayCare Laboratories, LLC	BayCare SARS-CoV-2 RT PCR Assay	Molecular Test	RT-PCR	Not Reported	Not Reported
		2020-08-31
2021-01-28	AIT Laboratories	SARS-CoV-2 Assay	Molecular Test	RT-PCR	1	1
		2020-04-24
2021-01-29	CSI Laboratories	CSI SARS-CoV-2 RT PCR Test	Molecular Test	RT-PCR	1	1
		2020-06-01
2021-01-29	OPTI Medical Systems, Inc.	OPTI SARS-CoV-2 RT PCR Test	Molecular Test	RT-PCR	Not Reported	Not Reported
		2020-05-06
2021-01-29	Diagnostic Solutions Laboratory, LLC	DSL COVID-19 Assay	Molecular Test	RT-PCR	1	0.97
		2020-06-25
2021-01-29	Sandia National Laboratories	SNL-NM 2019 nCoV Real-Time RT-PCR Diagnostic Assay	Molecular Test	RT-PCR	1	1
		2020-07-27
2021-02-01	BGI Genomics Co. Ltd	Real-Time Fluorescent RT-PCR Kit for Detecting SARS-CoV-2	Molecular Test	RT-PCR	Not Reported	Not Reported
		2020-03-26
2021-02-03	Cormeum Laboratory Services	Cormeum SARS-CoV-2 Assay	Molecular Test	RT-PCR	1	1
		2020-06-12
2021-02-03	Mesa Biotech Inc.	Accula SARS-Cov-2 Test	Molecular Test	RT-PCR	Not Reported	Not Reported
		2020-03-23
2021-02-03	DiaCarta, Inc	QuantiVirus SARS-CoV-2 Test kit	Molecular Test	RT-PCR	0.967	1
		2020-04-08
2021-02-03	PlexBio Co., Ltd.	IntelliPlex SARS-CoV-2 Detection Kit	Molecular Test	RT-PCR	Not Reported	Not Reported
		2020-06-25
2021-02-05	PerkinElmer, Inc.	PerkinElmer New Coronavirus Nucleic Acid Detection Kit	Molecular Test	RT-PCR	Not Reported	Not Reported
		2020-03-24
2021-02-05	Access Bio, Inc.	CareStart COVID-19 MDx RT-PCR	Molecular Test	RT-PCR	1	1
		2020-07-07
2021-02-08	Visby Medical, Inc.	Visby Medical COVID-19 Point of Care Test	Molecular Test	RT-PCR	1	0.953
		2021-02-08
2021-02-10	Becton, Dickinson and Company (BD)	BD SARS-CoV-2/Flu for BD MAX System	Molecular Test	RT-PCR	Not Reported	Not Reported
		2021-02-10
2021-02-11	Bio-Rad Laboratories, Inc.	Bio-Rad Reliance SARS-CoV-2/FluA/FluB RT-PCR Assay Kit	Molecular Test	RT-PCR	96.2% (SARS-CoV-2), 100% (flu A), 98.3% (flu B)	100% (SARS-CoV-2), 98.9% (flu A), 100% (flu B)
		2021-02-11
2021-02-13	Everlywell, Inc.	Everlywell COVID-19 Test Home Collection Kit DTC	Molecular Test	RT-PCR	Not Reported	Not Reported
		2021-02-13
2021-02-22	DxTerity Diagnostics, Inc.	DxTerity SARS-CoV-2 RT PCR CE Test	Molecular Test	RT-PCR	Not Reported	Not Reported
		2020-08-28
2021-02-23	Thermo Fisher Scientific, Inc.	TaqPath COVID-19 Combo Kit	Molecular Test	RT-PCR	Not Reported	Not Reported
		2020-03-13
2021-02-26	Fluidigm Corporation	Advanta Dx SARS-CoV-2 RT-PCR Assay	Molecular Test	RT-PCR	1	1
		2020-08-25
2021-02-26	Clinical Enterprise, Inc.	EmpowerDX COVID-19 Home Collection Kit DTC	Molecular Test	RT-PCR	Not Reported	Not Reported
		2020-10-15
2021-03-02	binx health, Inc.	binx health At-Home Nasal Swab COVID-19 Sample Collection Kit	Molecular Test	RT-PCR	Not Reported	Not Reported
		2020-10-20
2021-03-03	Luminex Molecular Diagnostics, Inc.	NxTAG Respiratory Pathogen Panel + SARS-CoV-2	Molecular Test	RT-PCR	Not Reported	Not Reported
		2021-03-03
2021-03-04	Abbott Molecular Inc.	Alinity m Resp-4-Plex	Molecular Test	RT-PCR	Not Reported	Not Reported
		2021-03-04
2021-03-05	Clinical Research Sequencing Platform (CRSP), LLC at the Broad Institute of MIT and Harvard	CRSP SARS-CoV-2 Real-time Reverse Transcriptase (RT)-PCR Diagnostic Assay (Version 3)	Molecular Test	RT-PCR	0.983	1
		2021-03-05
2021-03-09	Gravity Diagnostics, LLC	Gravity Diagnostics SARS-CoV-2 RT-PCR for use with DTC kits	Molecular Test	RT-PCR	96.4% (symptomatic), 100% (asymptomatic)	100% (symptomatic), 100% (asymptomatic)
		2021-02-13
2021-03-09	GetMyDNA	GetMyDNA COVID-19 Test Home Collection Kit	Molecular Test	RT-PCR	Not Reported	Not Reported
		2021-03-09
2021-03-10	Becton, Dickinson & Company	BD SARS-CoV-2 Reagents for BD MAX System	Molecular Test	RT-PCR	Not Reported	Not Reported
		2020-04-08
2021-03-11	Infinity BiologiX LLC	Infinity BiologiX TaqPath SARS-CoV-2 Assay	Molecular Test	RT-PCR	Not Reported	Not Reported
		2020-04-10
2021-03-12	BioFire Defense, LLC	BioFire COVID-19 Test	Molecular Test	RT-PCR	Not Reported	Not Reported
		2020-03-23
2021-03-18	LetsGetChecked, Inc.	LetsGetChecked Coronavirus (COVID-19) Test	Molecular Test	RT-PCR	Not Reported	Not Reported
		2020-05-28
2021-03-24	Tempus Labs, Inc.	iC SARS-CoV2 Test	Molecular Test	RT-PCR	1	0.97
		2020-10-01
2021-03-25	NeuMoDx Molecular, Inc.	NeuMoDx Flu A-B/RSV/SARS-CoV-2 Vantage Assay	Molecular Test	RT-PCR	1	0.98
		2021-03-25
2021-03-29	BGI Genomics Co. Ltd	Real-Time Fluorescent RT-PCR Kit for Detecting SARS-CoV-2	Molecular Test	RT-PCR	Not Reported	Not Reported
		2020-03-26
2021-03-29	DxTerity Diagnostics, Inc.	DxTerity SARS-CoV-2 RT PCR CE Test	Molecular Test	RT-PCR	Not Reported	Not Reported
		2020-08-28
2021-03-30	Verily Life Sciences	Verily COVID-19 RT-PCR Test	Molecular Test	RT-PCR	1	1
		2020-09-08
2021-04-01	DiaSorin Molecular LLC	Simplexa COVID-19 Direct assay	Molecular Test	RT-PCR	Not Reported	Not Reported
		2020-03-19
2021-04-01	PerkinElmer, Inc.	PerkinElmer New Coronavirus Nucleic Acid Detection Kit	Molecular Test	RT-PCR	Not Reported	Not Reported
		2020-03-24
2021-04-01	P23 Labs, LLC.	P23 Labs TaqPath SARS-CoV-2 Assay	Molecular Test	RT-PCR	Not Reported	Not Reported
		2020-05-21
2021-04-01	Gravity Diagnostics, LLC	Gravity Diagnostics SARS-CoV-2 RT-PCR Assay	Molecular Test	RT-PCR	0.964	1
		2020-11-23
2021-04-02	University of Illinois Office of the Vice President for Economic Development and Innovation	covidSHIELD	Molecular Test	RT-PCR	0.958	0.989
		2021-02-24
2021-04-07	Fast Track Diagnostics Luxembourg S.á.r.l. (a Siemens Healthineers Company)	FTD SARS-CoV-2	Molecular Test	RT-PCR	Not Reported	Not Reported
		2020-05-05
2021-04-12	PerkinElmer Genomics	PerkinElmer SARS-CoV-2 RT-qPCR Reagent Kit	Molecular Test	RT-PCR	1	1
		2021-04-12
2021-04-20	Southern California Permanente Medical Group	Kaiser Permanente High Throughput SARS-CoV-2 Assay	Molecular Test	RT-PCR	0.99	0.96
		2021-04-19
2021-04-20	Cepheid	Xpert Omni SARS-CoV-2	Molecular Test	RT-PCR	1	1
		2020-11-27
2021-04-21	Quidel Corporation	Lyra SARS-CoV-2 Assay	Molecular Test	RT-PCR	1	1
		2021-03-07
2021-04-23	NeuMoDx Molecular, Inc.	NeuMoDx Flu A-B/RSV/SARS-CoV-2 Vantage Assay	Molecular Test	RT-PCR	100% (Flu A), 100% (Flu B), 100% (RSV), 100% (SARS-CoV-2)	98.0% (Flu A), 100% (Flu B), 98.0% (RSV), 98.0% (SARS-CoV-2)
		2021-03-25
2021-04-27	BioFire Diagnostics, LLC	BioFire Respiratory Panel 2.1-EZ (RP2.1-EZ)	Molecular Test	RT-PCR	0.98	1
		2020-10-02
2021-04-30	SML GENETREE Co., Ltd.	Ezplex SARS-CoV-2 G Kit	Molecular Test	RT-PCR	1	1
		2021-01-14
2021-05-04	Agena Bioscience, Inc.	MassARRAY SARS-CoV-2 Panel	Molecular Test	RT-PCR	0.989	1
		2020-10-26
2021-05-10	Gravity Diagnostics, LLC	Gravity Diagnostics SARS-CoV-2 RT-PCR for use with DTC kits	Molecular Test	RT-PCR	96.4% (symptomatic), 100% (asymptomatic)	100% (symptomatic), 100% (asymptomatic)
		2021-02-13
2021-05-17	Phosphorus Diagnostics LLC	Phosphorous COVID19 RT-qPCR Test DTC	Molecular Test	RT-PCR	1	1
		2021-05-17
2021-05-17	Phosphorus Diagnostics LLC	Phosphorous COVID19 RT-qPCR Test	Molecular Test	RT-PCR	97.1%%	0.982
		2021-05-17
2021-05-18	LGC, Biosearch Technologies	Biosearch Technologies SARS-CoV-2 Real-Time and End-Point RT-PCR Test	Molecular Test	RT-PCR	1	1
		2021-04-15
2021-05-20	Genetron Health (Beijing) Co., Ltd.	Genetron SARS-CoV-2 RNA Test	Molecular Test	RT-PCR	1	0.971
		2020-06-05
2021-05-25	Thermo Fisher Scientific Inc.	TaqPath COVID-19 Pooling Kit	Molecular Test	RT-PCR	1	1
		2021-05-25
2021-05-25	Quidel Corporation	Lyra Direct SARS-CoV-2 Assay	Molecular Test	RT-PCR	0.96	1
		2020-05-18
2021-05-28	STS Lab Holdco (a subsidiary of Amazon.com Services LLC)	Amazon Real-Time RT-PCR Test for Detecting SARS-CoV-2	Molecular Test	RT-PCR	0.96	1
		2021-03-25
2021-06-02	Synergy Diagnostic Laboratory, Inc., DBA SynergyDx	SynergyDx SARS-CoV-2 RNA Test	Molecular Test	RT-PCR	1	1
		2021-04-16
2021-06-02	Synergy Diagnostic Laboratory, Inc., DBA SynergyDx	SynergyDx SARS-CoV-2 RNA Test DTC	Molecular Test	RT-PCR	1	1
		2021-04-16
2021-06-03	Yale School of Public Health, Department of Epidemiology of Microbial Diseases	SalivaDirect	Molecular Test	RT-PCR	0.941	0.909
		2021-04-09
2021-06-08	Applied BioCode, Inc.	BioCode SARS-CoV-2 Assay	Molecular Test	RT-PCR	0.976	0.961
		2020-06-15
2021-06-15	Clinical Research Sequencing Platform (CRSP), LLC at the Broad Institute of MIT and Harvard	CRSP SARS-CoV-2 Real-time Reverse Transcriptase (RT)-PCR Diagnostic Assay	Molecular Test	RT-PCR	1	1
		2021-03-05
2021-06-17	Roche Molecular Systems	cobas SARS-CoV-2 Nucleic Acid Test	Molecular Test	RT-PCR	0.961	0.968
		2021-06-17
2021-06-17	Wren Laboratories LLC	Wren Laboratories COVID-19 PCR Test DTC	Molecular Test	RT-PCR	1	1
		2021-08-03
2021-06-22	Biomeme, Inc.	Biomeme SARS-CoV-2 Real-Time RT-PCR Test	Molecular Test	RT-PCR	0.97	0.98
		2020-08-11
2021-06-22	Fulgent Therapeutics, LLC	Fulgent COVID-19 by RT-PCR Test	Molecular Test	RT-PCR	1	1
		2020-05-15
2021-06-23	Viracor Eurofins Clinical Diagnostics	Viracor SARS-CoV-2 assay	Molecular Test	RT-PCR	1	0.992
		2020-04-06
2021-06-24	Clinomics USA Inc.	Clinomics TrioDx RT-PCR COVID-19 Test	Molecular Test	RT-PCR	1	1
		2021-02-04
2021-06-24	Roche Molecular Systems, Inc.	cobas SARS-CoV-2 & Influenza A/B	Molecular Test	RT-PCR	96.4% (SARS-CoV-2) 100% (Flu A) 100% (Flu B)	98% (SARS-CoV-2) 99.6% (Flu A) 99.7% (Flu B)
		2020-09-14
2021-06-24	OSANG Healthcare	GeneFinder COVID-19 Plus RealAmp Kit	Molecular Test	RT-PCR	1	1
		2020-04-18
2021-06-29	BioGX, Inc.	BioGX Xfree COVID-19 Direct RT-PCR	Molecular Test	RT-PCR	0.95	1
		2021-06-29
2021-07-01	Assurance Scientific Laboratories	Assurance SARS-CoV-2 Panel	Molecular Test	RT-PCR	1	1
		2020-05-15
2021-07-01	Rheonix, Inc.	Rheonix COVID-19 MDx Assay	Molecular Test	RT-PCR	95-100%	1
		2020-04-29
2021-07-08	Thermo Fisher Scientific Inc.	TaqPath COVID-19 Fast PCR Combo Kit 2.0	Molecular Test	RT-PCR	0.967	0.95
		2021-07-08
2021-07-14	ISPM Labs, LLC dba Capstone Healthcare	Genus SARS-CoV-2 Assay	Molecular Test	RT-PCR	1	1
		2020-08-03
2021-07-15	KimForest Enterprise Co., Ltd.	KimForest SARS-CoV-2 Detection Kit v1	Molecular Test	RT-PCR	1	1
		2020-09-21
2021-07-15	altona Diagnostics GmbH	RealStar SARS-CoV02 RT-PCR Kits U.S.	Molecular Test	RT-PCR	0.881	0.996
		2020-04-22
2021-07-16	Ambry Genetics Laboratory	Ambry COVID-19 RT-PCR Test	Molecular Test	RT-PCR	0.968	1
		2021-01-22
2021-07-16	Enzo Life Sciences, Inc.	AMPIPROBE SARS-CoV-2 Test System	Molecular Test	RT-PCR	0.962	0.98
		2020-07-07
2021-07-22	PathogenDx, Inc.	DetectX-Rv	Molecular Test	RT-PCR	0.95	1
		2021-04-20
2021-07-23	Hologic, Inc.	Panther Fusion SARS-CoV-2 Assay	Molecular Test	RT-PCR	1	1
		2020-03-16
2021-07-28	GenMark Diagnostics, Inc.	ePlex Respiratory Pathogen Panel 2	Molecular Test	RT-PCR	1	1
		2020-10-07
2021-07-28	Access Genetics, LLC	OraRisk COVID-19 RT-PCR	Molecular Test	RT-PCR	100% (NP swab), 100% (nasal swab)	100% (NP swab), 95.7% (nasal swab)
		2020-07-17
2021-07-30	Life Technologies Corporation (a part of Thermo Fisher Scientific Inc.)	TaqPath COVID-19 Fast PCR Combo Kit 2.0	Molecular Test	RT-PCR	0.971	0.976
		2021-07-30
2021-08-02	Life Technologies Corporation (a part of Thermo Fisher Scientific Inc.)	TaqPath COVID-19 MS2 Combo Kit 2.0	Molecular Test	RT-PCR	0.967	1
		2021-08-02
2021-08-03	Thermo Fisher Scientific	TaqPath COVID-19, FluA, FluB Combo Kit	Molecular Test	RT-PCR	96.1% (SARS-CoV-2), 95.5% (flu A), 91.7% (flu B)	100% (SARS-CoV-2), 99% (flu A), 96.8% (flu B)
		2021-08-10
2021-08-09	STS Lab Holdco (a subsidiary of Amazon.com Services LLC)	Amazon Real-Time RT-PCR DTC Test for Detecting SARS-CoV-2	Molecular Test	RT-PCR	0.957	1
		2021-05-28
2021-08-09	Cleveland Clinic Robert J. Tomsich Pathology and Laboratory Medicine Institute	SelfCheck COVID-19 TaqPath Multiplex PCR	Molecular Test	RT-PCR	1	1
		2021-08-09
2021-08-11	STS Lab Holdco (a subsidiary of Amazon.com Services LLC)	Amazon Multi-Target SARS-CoV-2 Real-Time RT-PCR DTC Test	Molecular Test	RT-PCR	0.99	0.994
		2021-08-11
2021-08-13	Gravity Diagnostics, LLC	Gravity Diagnostics SARS-CoV-2 RT-PCR Assay	Molecular Test	RT-PCR	0.964	1
		2020-11-23
2021-08-13	CENTOGENE US, LLC	CentoFast-SARS-CoV-2 RT-PCR Assay	Molecular Test	RT-PCR	1	1
		2020-07-01
2021-08-13	CENTOGENE US, LLC	CentoSure SARS-CoV-2 RT-PCR Assay	Molecular Test	RT-PCR	1	1
		2020-09-29
2021-08-23	The Mount Sinai Hospital, Center for Clinical Laboratories	Mount Sinai SARS-CoV-2 Assay	Molecular Test	RT-PCR	1	1
		2021-08-23
2021-08-26	University of Illinois Office of the Vice President for Economic Development and Innovation	covidSHIELD	Molecular Test	RT-PCR	0.958	0.989
		2021-02-24
2021-08-26	Gencurix, Inc.	GenePro SARS-CoV-2 Test	Molecular Test	RT-PCR	1	1
		2020-06-23
2021-08-27	TBG Biotechnology Corp.	ExProbe SARS-CoV-2 Testing Kit	Molecular Test	RT-PCR	1	0.995
		2020-06-10
