# Supplementary material for: Molecular and antigen tests, and sample types for diagnosis of COVID-19: a review
Source: Future Virol. 2022 Jul 1;17(9):675–85. doi: 10.2217/fvl-2021-0256 (PMC9248776; doi:10.2217/fvl-2021-0256)
Supplement: Supplementary file 2 [file fvl-17-675-s2.xlsx]

## Sheet: RT-qPCR
Date	Manufactory	Letter Granting Inclusion under EUA and Original Issue Date	Sensitivity	Specificity
2020-05-08	Gnomegen LLC	Gnomegen COVID-19-RT-qPCR Detection Kit	1	1
		2020-05-08
2020-09-22	ScienCell Research Laboratories	ScienCell SARS-CoV-2 Coronavirus Real-time RT-PCR (RT-qPCR) Detection Kit	1	1
		2020-04-03
2020-12-09	Bioeksen R&D Technologies Ltd.	Bio-Speedy Direct RT-qPCR SARS-CoV-2	Not Reported	Not Reported
		2020-09-02
2021-03-01	Phosphorus Diagnostics LLC	Phosphorus COVID-19 RT-qPCR Test	0.971	0.982
		2020-06-04
