# Supplementary material for: Molecular and antigen tests, and sample types for diagnosis of COVID-19: a review
Source: Future Virol. 2022 Jul 1;17(9):675–85. doi: 10.2217/fvl-2021-0256 (PMC9248776; doi:10.2217/fvl-2021-0256)
Supplement: Supplementary file 3 [file fvl-17-675-s3.xlsx]

## Sheet: RT-LAMP
Date	Manufactory	Letter Granting Inclusion under EUA and Original Issue Date	Diagnostic Testing	Assay Techniques	Sensitivity	Specificity
2020-07-09	UCSF Health Clinical Laboratories, UCSF Clinical Labs at China Basin	SARS-CoV-2 RNA DETECTR Assay	Molecular Test	RT-LAMP	0.95	1
		2020-07-09
2020-08-31	Mammoth Biosciences, Inc.	SARS-CoV-2 DETECTR Reagent Kit	Molecular Test	RT-LAMP	Not Reported	Not Reported
		2020-08-31
2020-10-06	Detectachem Inc.	MobileDetect Bio BCC19 (MD-Bio BCC19) Test Kit	Molecular Test	RT-LAMP	0.98	1
		2020-09-01
2021-01-14	Sherlock BioSciences, Inc.	Sherlock CRISPR SARS-CoV-2 Kit	Molecular Test	RT-LAMP	Not Reported	Not Reported
		2020-05-06
2021-02-23	Seasun Biomaterials, Inc.	AQ-TOP COVID-19 Rapid Detection Kit	Molecular Test	RT-LAMP	1	1
		2020-05-21
2021-04-29	SEASUN BIOMATERIALS, Inc.	AQ-TOP COVID-19 Rapid Detection Kit PLUS	Molecular Test	RT-LAMP	1	1
		2020-10-05
2021-05-28	Pro-Lab Diagnostics	Pro-AmpRT SARS-CoV-2 Test	Molecular Test	RT-LAMP	0.966	1
		2020-08-13
2021-07-09	Color Health, Inc.	Color SARS-CoV-2 RT-LAMP Diagnostic Assay	Molecular Test	RT-LAMP	1	1
		2021-05-18
