# Supplementary material for: Molecular and antigen tests, and sample types for diagnosis of COVID-19: a review
Source: Future Virol. 2022 Jul 1;17(9):675–85. doi: 10.2217/fvl-2021-0256 (PMC9248776; doi:10.2217/fvl-2021-0256)
Supplement: Supplementary file 4 [file fvl-17-675-s4.xlsx]

## Sheet: NGS
Date	Manufactory	Letter Granting Inclusion under EUA and Original Issue Date	Diagnostic Testing	Assay Techniques	Sensitivity	Specificity
2020-08-06	Helix OpCo LLC (dba Helix)	Helix COVID-19 NGS Test	Molecular Test	NGS	1	1
		2020-08-06
2020-10-08	University of California, Los Angeles (UCLA)	UCLA SwabSeq COVID-19 Diagnostic Platform	Molecular Test	NGS	1	1
		2020-10-06
2020-12-28	Clear Labs, Inc.	Clear Dx SARS-CoV-2 Test	Molecular Test	NGS	1	1
		2020-09-23
2021-04-22	Illumina, Inc.	Illumina COVIDSeq Test	Molecular Test	NGS	0.98	0.974
		2020-06-09
2021-06-23	BillionToOne, Inc.	qSanger-COVID-19 Assay	Molecular Test	NGS	0.9	1
		2020-09-04
2021-06-25	Twist Bioscience Corporation	SARS-CoV-2 NGS Assay	Molecular Test	NGS	0.967	1
		2021-03-23
