# Supplementary material for: Molecular and antigen tests, and sample types for diagnosis of COVID-19: a review
Source: Future Virol. 2022 Jul 1;17(9):675–85. doi: 10.2217/fvl-2021-0256 (PMC9248776; doi:10.2217/fvl-2021-0256)
Supplement: Supplementary file 5 [file fvl-17-675-s5.xlsx]

## Sheet: CRISPR
Clustered Regularly Interspaced Short Palindromic Repeats (CRISPR)
Date	Manufactory	Letter Granting Inclusion under EUA and Original Issue Date	Diagnostic Testing	Assay Techniques	Sensitivity	Specificity
2020-08-31	Mammoth Biosciences, Inc.	SARS-CoV-2 DETECTR Reagent Kit	Molecular Test	CRISPR	Not Reported	Not Reported
		2020-08-31
2021-01-14	Sherlock BioSciences, Inc.	Sherlock CRISPR SARS-CoV-2 Kit	Molecular Test	CRISPR	Not Reported	Not Reported
		2020-05-06
