# Supplementary material for: Molecular and antigen tests, and sample types for diagnosis of COVID-19: a review
Source: Future Virol. 2022 Jul 1;17(9):675–85. doi: 10.2217/fvl-2021-0256 (PMC9248776; doi:10.2217/fvl-2021-0256)
Supplement: Supplementary file 6 [file fvl-17-675-s6.xlsx]

## Sheet: TMA
Date	Manufactory	Letter Granting Inclusion under EUA and Original Issue Date	Diagnostic Testing	Assay Techniques	Sensitivity	Specificity
2020-08-03	Poplar Healthcare	Poplar SARS-CoV-2 TMA Pooling assay	Molecular Test	TMA	1	1
		2020-08-03
2020-08-21	Quest Diagnostics Infectious Disease, Inc.	Quest Diagnostics HA SARS-CoV-2 Assay	Molecular Test	TMA	Not Reported	Not Reported
		2020-07-15
2020-12-11	ResearchDx, Inc., DBA Pacific Diagnostics	PacificDx Covid-19	Molecular Test	TMA	Not Reported	Not Reported
		2020-12-11
2021-02-10	Grifols Diagnostic Solutions Inc.	Procleix SARS-CoV-2 Assay	Molecular Test	TMA	1	1
		2021-02-10
2021-03-18	LetsGetChecked, Inc.	LetsGetChecked Coronavirus (COVID-19) Test	Molecular Test	TMA	Not Reported	Not Reported
		2020-05-28
2021-05-06	Hologic, Inc.	Panther Fusion SARS-CoV-2/Flu Assay	Molecular Test	TMA	96.1% (SARS-CoV-2), 100% (flu A), 100% (flu B)	99.6% (SARS-CoV-2), 99.2% (flu A), 100% (flu B)
		2020-12-16
2021-07-22	Hologic, Inc.	Aptima SARS-CoV-2 Assay	Molecular Test	TMA	1	0.98
		2020-05-14
