# Supplementary material for: Molecular and antigen tests, and sample types for diagnosis of COVID-19: a review
Source: Future Virol. 2022 Jul 1;17(9):675–85. doi: 10.2217/fvl-2021-0256 (PMC9248776; doi:10.2217/fvl-2021-0256)
Supplement: Supplementary file 7 [file fvl-17-675-s7.xlsx]

## Sheet: Rapid Antigen Test
Date	Manufactory	Letter Granting Inclusion under EUA and Original Issue Date	AssayTechniques	Sensitivity	Specificity
2020-07-17	Quidel Corporation	Sofia SARS Antigen FIA	Rapid Antigen Test	0.903	0.98
		2020-05-08
2020-08-31	MiraDx	MiraDx SARS-CoV-2 RT-PCR assay	Rapid Antigen Test	0.976	0.966
		2020-08-31
2020-09-17	Abbott Diagnostics Scarborough, Inc.	ID NOW COVID-19	Rapid Antigen Test	0.846	0.985
		2020-03-27
2020-10-02	Quidel Corporation	Sofia 2 Flu + SARS Antigen FIA	Rapid Antigen Test	95.2% (SARS-CoV-2) 94.8% (Flu A) 78.5-90% (Flu B)	100% (SARS-CoV-2) 97-100% (Flu A) 100% (Flu B)
		2020-10-02
2020-10-23	Celltrion USA, Inc.	Sampinute COVID-19 Antigen MIA	Rapid Antigen Test	0.944	1
		2020-10-23
2020-10-28	Luminex Corporation	ARIES SARS-CoV-2 Assay	Rapid Antigen Test	Not Reported	Not Reported
		2020-04-03
2020-12-07	Luminostics, Inc.	Clip COVID Rapid Antigen Test	Rapid Antigen Test	Not Reported	Not Reported
		2020-12-07
2020-12-16	Abbott Diagnostics Scarborough, Inc.	BinaxNOW COVID-19 Ag Card	Rapid Antigen Test	0.846	0.985
		2020-08-26
2020-12-22	Quidel Corporation	QuickVue SARS Antigen Test	Rapid Antigen Test	0.848	0.991
		2020-12-18
2021-01-05	Quanterix Corporation	Simoa SARS-CoV-2 N Protein Antigen Test	Rapid Antigen Test	0.977	1
		2021-01-05
2021-01-26	LumiraDx UK Ltd.	LumiraDx SARS-CoV-2 Ag Test	Rapid Antigen Test	0.976	0.966
		2020-08-18
2021-02-04	Princeton BioMeditech Corp.	Status COVID-19/Flu	Rapid Antigen Test	0.939	0.939
		2021-02-04
2021-02-08	Access Bio, Inc.	CareStart COVID-19 Antigen test	Rapid Antigen Test	93.8% (NP), 87.2% (nasal)	99.3% (NP), 100% (nasal)
		2020-10-08
2021-02-09	Ortho Clinical Diagnostics, Inc.	VITROS Immunodiagnostic Products SARS-CoV-2 Antigen Reagent Pack	Rapid Antigen Test	Not Reported	Not Reported
		2021-01-11
2021-02-11	Ellume Limited	Ellume COVID-19 Home Test	Rapid Antigen Test	Not Reported	Not Reported
		2020-12-15
2021-03-01	Quidel Corporation	QuickVue At-Home COVID-19 Test	Rapid Antigen Test	0.848	0.991
		2021-03-01
2021-03-15	Access Bio, Inc.	CareStart COVID-19 Antigen test	Rapid Antigen Test	93.8% (NP), 87.2% (nasal)	99.3% (NP), 100% (nasal)
		2020-10-08
2021-03-16	Ortho Clinical Diagnostics, Inc.	VITROS Immunodiagnostic Products SARS-CoV-2 Antigen Reagent Pack	Rapid Antigen Test	Not Reported	Not Reported
		2021-01-11
2021-03-26	DiaSorin, Inc.	LIAISON SARS-CoV-2 Ag	Rapid Antigen Test	Not Reported	Not Reported
		2021-03-26
2021-03-31	Becton, Dickinson and Company (BD)	BD Veritor System for Rapid Detection of SARS-CoV-2	Rapid Antigen Test	84% (symptomatic)	100% (symptomatic)
		2020-07-02
2021-03-31	Quidel Corporation	QuickVue At-Home OTC COVID-19 Test	Rapid Antigen Test	0.835	0.992
		2021-03-31
2021-03-31	Abbott Diagnostics Scarborough, Inc.	BinaxNOW COVID-19 Ag Card 2 Home Test	Rapid Antigen Test	91.7% (symptomatic)	100% (symptomatic)
		2021-03-31
2021-03-31	Abbott Diagnostics Scarborough, Inc.	BinaxNOW COVID-19 Ag 2 Card	Rapid Antigen Test	84.6% (symptomatic)	98.5% (symptomatic)
		2021-03-31
2021-04-01	Quidel Corporation	Sofia SARS Antigen FIA	Rapid Antigen Test	0.952	1
		2020-05-08
2021-04-01	Abbott Diagnostics Scarborough, Inc.	BinaxNOW COVID-19 Antigen Self Test	Rapid Antigen Test	91.7% (symptomatic)	100% (symptomatic)
		2021-03-31
2021-05-21	InBios International, Inc	Smart Detect SARS-CoV-2 rRT-PCR Kit	Rapid Antigen Test	0.866	1
		2020-04-07
