# Supplementary material for: Molecular and antigen tests, and sample types for diagnosis of COVID-19: a review
Source: Future Virol. 2022 Jul 1;17(9):675–85. doi: 10.2217/fvl-2021-0256 (PMC9248776; doi:10.2217/fvl-2021-0256)
Supplement: Supplementary file 8 [file fvl-17-675-s8.xlsx]

## Sheet: Home Testing
Date	Manufactory	Letter Granting Inclusion under EUA and Original Issue Date	AssayTechniques	Type	Sensitivity	Specificity
2020-11-18	Lucira Health, Inc.	Lucira COVID-19 All-In-One Test Kit	Rapid Antigen Test	Prescription	Not Reported	Not Reported
		2020-11-17
2021-03-05	Cue Health Inc.	Cue COVID-19 Test for Home and Over The Counter (OTC) Use	Rapid Antigen Test	Over The Counter	96% (symptomatic), (100% asymptomatic)	98% (symptomatic), 100% (asymptomatic)
		2021-03-05
2021-04-12	Abbott BinaxNow	BinaxNow COVID-19 Ag Card Home Test	Rapid Antigen Test	Prescription	0.917	1
		2021-04-12
