# Supplementary material for: Molecular and antigen tests, and sample types for diagnosis of COVID-19: a review
Source: Future Virol. 2022 Jul 1;17(9):675–85. doi: 10.2217/fvl-2021-0256 (PMC9248776; doi:10.2217/fvl-2021-0256)
Supplement: Supplementary file 9 [file fvl-17-675-s9.xlsx]

## Sheet: Home Collection
Date	Manufactory	Letter Granting Inclusion under EUA and Original Issue Date	Collection Techniques	Sensitivity	Specificity
2020-04-02	Alimetrix, Inc.	Alimetrix SARS-CoV-2 RT-PCR Assay	Home Collection	100% (automated extraction), 96.7% (manual)	93.3% (automated extraction), 93% (manual)
		2020-09-30
2020-06-15	Fulgent Therapeutics, LLC	Fulgent COVID-19 by RT-PCR Test	Home Collection	1	1
		2020-05-15
2020-07-13	Compass Laboratory Services, LLC	Compass Laboratory Services SARS-CoV2 Assay	Home Collection	1	0.96
		2020-07-13
2020-07-30	Clinical Reference Laboratory, Inc.	CRL Rapid Response	Home Collection	1	1
		2020-07-30
2020-08-21	Quest Diagnostics Infectious Disease, Inc.	Quest Diagnostics PF SARS-CoV-2 Assay	Home Collection	Not Reported	Not Reported
		2020-07-15
2020-08-21	Quest Diagnostics Infectious Disease, Inc.	Quest Diagnostics HA SARS-CoV-2 Assay	Home Collection	Not Reported	Not Reported
		2020-07-15
2020-09-04	Everlywell, Inc.	Everlywell COVID-19 Test Home Collection Kit	Home Collection	Not Reported	Not Reported
		2020-05-15
2020-09-21	Assurance Scientific Laboratories	Assurance SARS-CoV-2 Panel	Home Collection	1	1
		2020-05-15
2020-09-21	Gravity Diagnostics, LLC	Gravity Diagnostics COVID-19 Assay	Home Collection	0.97	1
		2020-06-01
2020-09-21	Ethos Laboratories	Ethos Laboratories SARS-CoV-2 MALDI-TOF Assay	Home Collection	0.981	0.963
		2020-08-03
2020-09-21	Exact Sciences Laboratories	SARS-CoV-2 (N gene detection) Test	Home Collection	0.95	1
		2020-05-22
2020-10-17	Genetrack Biolabs, Inc.	Genetrack SARS-CoV-2 Molecular Assay	Home Collection	Not Reported	Not Reported
		2020-09-25
2020-10-20	P23 Labs, LLC.	P23 Labs TaqPath SARS-CoV-2 Assay	Home Collection	Not Reported	Not Reported
		2020-05-21
2020-10-22	Helix OpCo LLC	Helix COVID-19 Test	Home Collection	Not Reported	Not Reported
		2020-07-23
2020-11-13	Quest Diagnostics Infectious Disease, Inc.	Quest SARS-CoV-2 rRT-PCR	Home Collection	Not Reported	Not Reported
		2020-03-17
2020-11-23	RapidRona, Inc.	RapidRona Self-Collection Kit	Home Collection	Not Reported	Not Reported
		2020-11-23
2020-11-24	Stanford Health Care Clinical Virology Laboratory	SARS-CoV-2 RT-PCR Assay	Home Collection	1	1
		2020-04-08
2020-11-27	Quest Diagnostics Infectious Disease, Inc.	Quest Diagnostics RC SARS-CoV-2 Assay	Home Collection	Not Reported	Not Reported
		2020-07-15
2020-12-04	Quest Diagnostics Infectious Disease, Inc.	Quest Diagnostics RC COVID-19+Flu RT-PCR	Home Collection	Not Reported	Not Reported
		2020-12-04
2020-12-09	Laboratory Corporation of America (LabCorp)	COVID-19 RT-PCR Test	Home Collection	1	1
		2020-03-16
2020-12-11	ResearchDx, Inc., DBA Pacific Diagnostics	PacificDx Covid-19	Home Collection	Not Reported	Not Reported
		2020-12-11
2020-12-16	Abbott Diagnostics Scarborough, Inc.	BinaxNOW COVID-19 Ag Card 2 Home Test	Home Collection	91.7% (symptomatic)	100% (symptomatic)
		2020-12-16
2020-12-18	Clinical Research Sequencing Platform (CRSP), LLC at the Broad Institute of MIT and Harvard	CRSP SARS-CoV-2 Real-time Reverse Transcriptase (RT)-PCR Diagnostic Assay	Home Collection	0.983	1
		2020-07-08
2021-01-19	Cleveland Clinic Robert J. Tomsich Pathology and Laboratory Medicine Institute	Cleveland Clinic SARS-CoV-2 Assay	Home Collection	0.97	1
		2020-08-03
2021-02-08	QDx Pathology Services	QDX SARS-CoV-2 Assay	Home Collection	Not Reported	Not Reported
		2020-08-25
2021-02-13	The Kroger Co.	Kroger Health COVID-19 Test Home Collection Kit	Home Collection	Not Reported	Not Reported
		2020-06-30
2021-02-13	Assurance Scientific Laboratories	Assurance SARS-CoV-2 Panel DTC	Home Collection	95.2% (symptomatic), 95.4% (asymptomatic)	97.7% (symptomatic), 97.5% (asymptomatic)
		2021-02-13
2021-02-13	Everlywell, Inc.	Everlywell COVID-19 Test Home Collection Kit DTC	Home Collection	Not Reported	Not Reported
		2021-02-13
2021-02-18	Color Health, Inc.	Color COVID-19 Self-Swab Collection Kit	Home Collection	Not Reported	Not Reported
		2020-08-31
2021-02-23	Thermo Fisher Scientific, Inc.	TaqPath COVID-19 Combo Kit	Home Collection	Not Reported	Not Reported
		2020-03-13
2021-02-26	Fluidigm Corporation	Advanta Dx SARS-CoV-2 RT-PCR Assay	Home Collection	1	1
		2020-08-25
2021-02-26	Clinical Enterprise, Inc.	EmpowerDX COVID-19 Home Collection Kit DTC	Home Collection	Not Reported	Not Reported
		2020-10-15
2021-02-26	Viracor Eurofins Clinical Diagnostics	Viracor SARS-CoV-2 assay DTC	Home Collection	Not Reported	Not Reported
		2021-02-26
2021-03-01	Phosphorus Diagnostics LLC	Phosphorus COVID-19 RT-qPCR Test	Home Collection	0.971	0.982
		2020-06-04
2021-03-02	binx health, Inc.	binx health At-Home Nasal Swab COVID-19 Sample Collection Kit	Home Collection	Not Reported	Not Reported
		2020-10-20
2021-03-03	Ambry Genetics Laboratory	Ambry COVID-19 RT-PCR Test	Home Collection	0.968	1
		2021-01-22
2021-03-05	Clinical Research Sequencing Platform (CRSP), LLC at the Broad Institute of MIT and Harvard	CRSP SARS-CoV-2 Real-time Reverse Transcriptase (RT)-PCR Diagnostic Assay (Version 3)	Home Collection	0.983	1
		2021-03-05
2021-03-09	Gravity Diagnostics, LLC	Gravity Diagnostics SARS-CoV-2 RT-PCR for use with DTC kits	Home Collection	96.4% (symptomatic), 100% (asymptomatic)	100% (symptomatic), 100% (asymptomatic)
		2021-02-13
2021-03-11	Infinity BiologiX LLC	Infinity BiologiX TaqPath SARS-CoV-2 Assay	Home Collection	Not Reported	Not Reported
		2020-04-10
2021-03-18	LetsGetChecked, Inc.	LetsGetChecked Coronavirus (COVID-19) Test	Home Collection	Not Reported	Not Reported
		2020-05-28
2021-03-19	Color Health, Inc.	Color COVID-19 Self-Swab Collection Kit	Home Collection	100%%	97%%
		2020-08-31
2021-03-24	Tempus Labs, Inc.	iC SARS-CoV2 Test	Home Collection	Not Reported	Not Reported
		2020-10-01
2021-03-25	STS Lab Holdco (a subsidiary of Amazon.com Services LLC)	Amazon Real-Time RT-PCR Test for Detecting SARS-CoV-2	Home Collection	Not Reported	Not Reported
		2021-03-25
2021-03-29	DxTerity Diagnostics, Inc.	DxTerity SARS-CoV-2 RT PCR CE Test	Home Collection	Not Reported	Not Reported
		2020-08-28
2021-03-30	Verily Life Sciences	Verily COVID-19 RT-PCR Test	Home Collection	1	1
		2020-09-08
2021-04-01	P23 Labs, LLC.	P23 Labs TaqPath SARS-CoV-2 Assay	Home Collection	Not Reported	Not Reported
		2020-05-21
2021-05-10	Gravity Diagnostics, LLC	Gravity Diagnostics SARS-CoV-2 RT-PCR for use with DTC kits	Home Collection	96.4% (symptomatic), 100% (asymptomatic)	100% (symptomatic), 100% (asymptomatic)
		2021-02-13
2021-05-14	RCA Laboratory Services LLC dba GENETWORx	GENETWORx Covid-19 Nasal Swab Test	Home Collection	Not Reported	Not Reported
		2020-12-15
2021-05-17	Phosphorus Diagnostics LLC	Pinpoint by Phosphorus COVID-19 Test Home Collection Kit DTC	Home Collection	1	1
		2021-05-17
2021-05-19	The Kroger Co.	Kroger Health COVID-19 Test Home Collection Kit	Home Collection	Not Reported	Not Reported
		2020-06-30
2021-05-26	GetMyDNA	GetMyDNA COVID-19 Test Home Collection Kit	Home Collection	Not Reported	Not Reported
		2021-03-09
2021-06-03	Everlywell, Inc.	Everlywell COVID-19 Test Home Collection Kit	Home Collection	Not Reported	Not Reported
		2020-05-15
2021-06-17	Wren Laboratories LLC	Wren Laboratories COVID-19 PCR Test	Home Collection	Not Reported	Not Reported
		2021-06-17
2021-06-17	Kaiser Permanente Mid-Atlantic States	KPMAS COVID-19 Test	Home Collection	Not Reported	Not Reported
		2020-06-13
2021-07-01	Everlywell, Inc.	Everlywell COVID-19 & Flu Test Home Collection Kit	Home Collection	Not Reported	Not Reported
		2021-07-01
2021-07-01	Assurance Scientific Laboratories	Assurance SARS-CoV-2 Panel DTC	Home Collection	Not Reported	Not Reported
		2021-02-13
2021-07-08	Harvard University Clinical Laboratory (HUCL)	Quaeris SARS-CoV-2 Assay	Home Collection	0.957	1
		2021-05-21
2021-07-14	Exact Sciences Laboratories	COVID-Flu Multiplex Assay	Home Collection	1	1
2021-08-13	Kwokman Diagnostics, LLC	Kwokman Diagnostics COVID-19 Home Collection Kit	Home Collection	Not Reported	Not Reported
		2021-08-13
